# Supplementary material
Source: Springer Nature journal article supplement (http://www.springermedizin.de/resource/supplementary/12891_2013_1843_MOESM1_ESM.pdf/9508618)

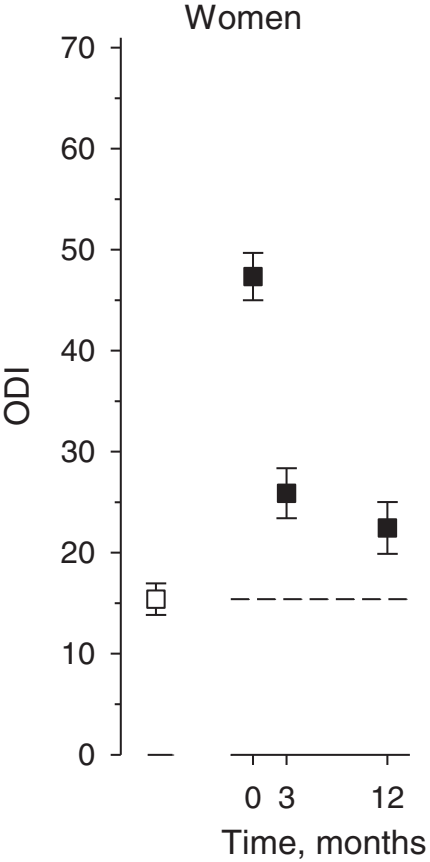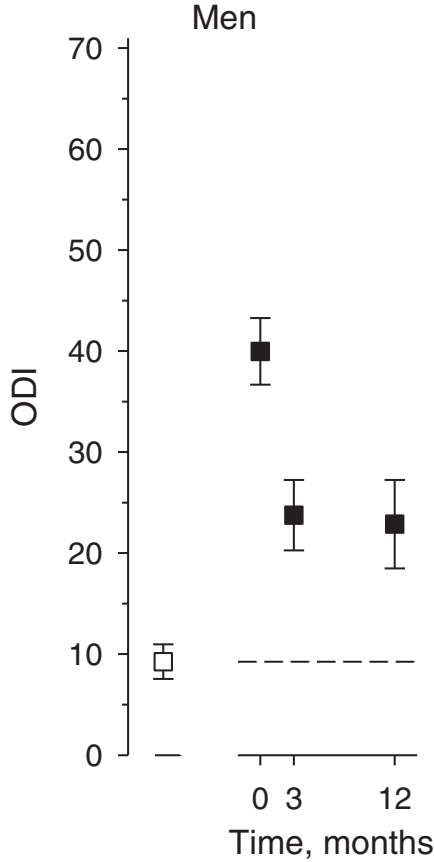

Supplement: MOESM1 [file 9508618]
